# Supplementary material for: Identification of IGFBP2 and IGFBP3 As Compensatory Biomarkers for CA19-9 in Early-Stage Pancreatic Cancer Using a Combination of Antibody-Based and LC-MS/MS-Based Proteomics
Source: PubMed Central journal article supplement (PMC5007017; doi:10.1371/journal.pone.0161009), 2016-08-31
Supplement: pone.0161009.s006.pdf [file pone.0161009.s006.pdf]

**S1 Table. SRM/MRM transitions**

| Protein name                                        | Peptide sequence  | SRM/MRM transition ( <i>m/z</i> ) |                |               |                |
|-----------------------------------------------------|-------------------|-----------------------------------|----------------|---------------|----------------|
|                                                     |                   | Q1/Q3-1                           | Q1/Q3-2        | Q1/Q3-3       | Q1/Q3-4        |
| 23 biomarker candidates for IDACP selected by RPPAs |                   |                                   |                |               |                |
| AK3L1                                               | TLGQAEALDK        | 523.3 / 831.4                     | 523.3 / 646.3  | 523.3 / 446.3 | 523.3 / 375.2  |
|                                                     | TLGQAEALDK*       | 527.3 / 839.4                     | 527.3 / 654.4  | 527.3 / 454.3 | 527.3 / 383.2  |
| ANXA6                                               | ALIEILATR         | 500.3 / 702.4                     | 500.3 / 573.4  | 500.3 / 815.5 | 500.3 / 460.3  |
|                                                     | ALIEILATR*        | 505.3 / 712.4                     | 505.3 / 583.4  | 505.3 / 825.5 | 505.3 / 470.3  |
| AP3B1                                               | LLDSITVPVAR       | 592.4 / 442.3                     | 592.4 / 957.5  | 592.4 / 643.4 | 592.4 / 541.3  |
|                                                     | LLDSITVPVAR*      | 597.4 / 452.3                     | 597.4 / 967.5  | 597.4 / 643.4 | 597.4 / 551.4  |
| ATP6S1                                              | NVLLFLQDK         | 545.3 / 876.5                     | 545.3 / 763.4  | 545.3 / 327.2 | 545.3 / 650.4  |
|                                                     | NVLLFLQDK*        | 549.3 / 884.5                     | 549.3 / 771.4  | 549.3 / 327.2 | 549.3 / 658.4  |
| C2 (C2b)                                            | SSGQWQTPGATR      | 638.3 / 501.3                     | 638.3 / 916.5  | 638.3 / 730.4 | 638.3 / 602.3  |
|                                                     | SSGQWQTPGATR*     | 643.3 / 511.3                     | 643.3 / 926.5  | 643.3 / 740.4 | 643.3 / 612.3  |
| CD82                                                | EDSLQDAWDYVQAQVK  | 947.9 / 573.3                     | 947.9 / 1136.6 | 632.3 / 573.3 | 632.3 / 672.4  |
|                                                     | EDSLQDAWDYVQAQVK* | 952.0 / 581.3                     | 952.0 / 1144.6 | 635.0 / 581.3 | 635.0 / 680.4  |
| CKS1B                                               | YDDEEFYR          | 633.3 / 987.4                     | 633.3 / 614.3  | 633.3 / 338.2 | 633.3 / 743.3  |
|                                                     | YDDEEFYR*         | 638.3 / 997.4                     | 638.3 / 624.3  | 638.3 / 348.2 | 638.3 / 753.3  |
| CKS2                                                | YFDEHYEYR         | 441.2 / 579.7                     | 441.2 / 506.2  | 441.2 / 630.3 | 441.2 / 338.2  |
|                                                     | YFDEHYEYR*        | 444.5 / 584.8                     | 444.5 / 511.2  | 444.5 / 640.3 | 444.5 / 348.2  |
| CSPG2                                               | YTLNFEEAAQK       | 592.8 / 807.4                     | 592.8 / 920.5  | 592.8 / 693.4 | 592.8 / 417.2  |
|                                                     | YTLNFEEAAQK*      | 596.8 / 815.4                     | 596.8 / 928.5  | 596.8 / 701.4 | 596.8 / 425.3  |
| CYCS                                                | YIPGTK            | 339.7 / 402.2                     | 339.7 / 248.2  | 339.7 / 277.2 | 339.7 / 305.2  |
|                                                     | YIPGTK*           | 343.7 / 410.2                     | 343.7 / 256.2  | 343.7 / 277.2 | 343.7 / 313.2  |
| EVI1                                                | HFTDSLK           | 424.2 / 285.1                     | 424.2 / 347.2  | 424.2 / 563.3 | 424.2 / 257.1  |
|                                                     | HFTDSLK*          | 428.2 / 285.1                     | 428.2 / 355.2  | 428.2 / 571.3 | 428.2 / 257.1  |
| HMGB2                                               | NYVPPK            | 359.2 / 341.2                     | 359.2 / 244.2  | 359.2 / 440.3 | 359.2 / 278.1  |
|                                                     | NYVPPK*           | 363.2 / 349.2                     | 363.2 / 252.2  | 363.2 / 448.3 | 363.2 / 278.1  |
| HYOU1                                               | DEPGEQVELK        | 572.3 / 450.2                     | 572.3 / 245.1  | 572.3 / 899.5 | 572.3 / 217.1  |
|                                                     | DEPGEQVELK*       | 576.3 / 454.3                     | 576.3 / 245.1  | 576.3 / 907.5 | 576.3 / 217.1  |
| IGFBP2                                              | LIQGAPTIR         | 484.8 / 742.4                     | 484.8 / 614.4  | 484.8 / 355.2 | 484.8 / 389.3  |
|                                                     | LIQGAPTIR*        | 489.8 / 752.4                     | 489.8 / 624.4  | 489.8 / 355.2 | 489.8 / 399.3  |
| MMP9                                                | SLGPALLLQK        | 576.9 / 952.6                     | 576.9 / 476.8  | 576.9 / 448.3 | 576.9 / 614.4  |
|                                                     | SLGPALLLQK*       | 580.9 / 960.6                     | 580.9 / 480.8  | 580.9 / 452.3 | 580.9 / 622.4  |
| MST4                                                | NNPPTLVGDFTK      | 651.8 / 537.8                     | 651.8 / 229.1  | 651.8 / 212.1 | 651.8 / 1074.6 |
|                                                     | NNPPTLVGDFTK*     | 655.8 / 541.8                     | 655.8 / 229.1  | 655.8 / 212.1 | 655.8 / 1082.6 |
| MYBL2                                               | EDNSLLNQGFLQAK    | 788.9 / 1018.6                    | 788.9 / 905.5  | 788.9 / 346.2 | 788.9 / 663.4  |
|                                                     | EDNSLLNQGFLQAK*   | 792.9 / 1026.6                    | 792.9 / 913.5  | 792.9 / 354.2 | 792.9 / 671.4  |

**S1 Table. Continued**

| Protein name                                          | Peptide sequence | SRM/MRM transition ( <i>m/z</i> ) |               |               |               |
|-------------------------------------------------------|------------------|-----------------------------------|---------------|---------------|---------------|
|                                                       |                  | Q1/Q3-1                           | Q1/Q3-2       | Q1/Q3-3       | Q1/Q3-4       |
| 23 biomarker candidates for IDACP selected by RPPAs   |                  |                                   |               |               |               |
| PI3                                                   | VPFNGQDPVK       | 550.8 / 501.3                     | 550.8 / 197.1 | 550.8 / 904.5 | 550.8 / 643.3 |
|                                                       | VPFNGQDPVK*      | 554.8 / 505.3                     | 554.8 / 197.1 | 554.8 / 912.5 | 554.8 / 651.4 |
| PPM1B                                                 | NVIEAVYSR        | 525.8 / 837.4                     | 525.8 / 724.4 | 525.8 / 595.3 | 525.8 / 327.2 |
|                                                       | NVIEAVYSR*       | 530.8 / 847.5                     | 530.8 / 734.4 | 530.8 / 605.3 | 530.8 / 327.2 |
| RNASE1                                                | YPNC(ACM)AYR     | 472.2 / 390.7                     | 472.2 / 683.3 | 472.2 / 780.3 | 472.2 / 569.2 |
|                                                       | YPNC(ACM)AYR*    | 477.2 / 395.7                     | 477.2 / 693.3 | 477.2 / 790.3 | 477.2 / 579.2 |
| RNASET2                                               | SWPFNLEEIK       | 631.8 / 989.5                     | 631.8 / 495.3 | 631.8 / 745.4 | 631.8 / 892.5 |
|                                                       | SWPFNLEEIK*      | 635.8 / 997.5                     | 635.8 / 499.3 | 635.8 / 753.4 | 635.8 / 900.5 |
| STMN1                                                 | DPADETEAD        | 481.7 / 205.1                     | 481.7 / 829.3 | 481.7 / 758.3 | 481.7 / 284.1 |
|                                                       | DPADETEA*D       | 483.7 / 209.1                     | 483.7 / 833.3 | 483.7 / 758.3 | 483.7 / 284.1 |
| VRK2                                                  | LPIPFPEGK        | 499.3 / 674.4                     | 499.3 / 430.2 | 499.3 / 324.2 | 499.3 / 787.4 |
|                                                       | LPIPFPEGK*       | 503.3 / 682.4                     | 503.3 / 438.2 | 503.3 / 324.2 | 503.3 / 795.4 |
| Additional proteins of biomarker candidates for IDACP |                  |                                   |               |               |               |
| C2 (C2a)                                              | HAILLLTDGK       | 540.8 / 209.1                     | 540.8 / 204.1 | 540.8 / 322.2 | 540.8 / 319.2 |
|                                                       | HAILLLTDGK*      | 544.8 / 209.1                     | 544.8 / 212.1 | 544.8 / 322.2 | 544.8 / 327.2 |
| CRP                                                   | ESDTSYVSLK       | 564.8 / 347.2                     | 564.8 / 696.4 | 564.8 / 609.4 | 564.8 / 446.3 |
|                                                       | ESDTSYVSLK*      | 568.8 / 355.2                     | 568.8 / 704.4 | 568.8 / 617.4 | 568.8 / 454.3 |
| IGFBP1                                                | ALPGEQQLHALTR    | 511.0 / 673.9                     | 511.0 / 460.3 | 511.0 / 807.5 | 511.0 / 597.3 |
|                                                       | ALPGEQQLHALTR*   | 514.3 / 678.9                     | 514.3 / 470.3 | 514.3 / 817.5 | 514.3 / 607.4 |
| IGFBP3                                                | YGQPLPGYTTK      | 612.8 / 876.5                     | 612.8 / 666.3 | 612.8 / 559.3 | 612.8 / 221.1 |
|                                                       | YGQPLPGYTTK*     | 616.8 / 884.5                     | 616.8 / 674.4 | 616.8 / 559.3 | 616.8 / 221.1 |
| Adiponectin                                           | IFYNQNHYDGSTGK   | 591.3 / 756.3                     | 591.3 / 829.9 | 591.3 / 674.8 | 591.3 / 261.2 |
|                                                       | IFYNQNHYDGSTGK*  | 593.9 / 760.3                     | 593.9 / 833.9 | 593.9 / 678.8 | 593.9 / 261.2 |
