# Supplementary material for: Identification of IGFBP2 and IGFBP3 As Compensatory Biomarkers for CA19-9 in Early-Stage Pancreatic Cancer Using a Combination of Antibody-Based and LC-MS/MS-Based Proteomics
Source: PubMed Central journal article supplement (PMC5007017; doi:10.1371/journal.pone.0161009), 2016-08-31
Supplement: pone.0161009.s007.pdf [file pone.0161009.s007.pdf]

**S2 Table. List of antibodies for RPPAs**

| No | Catalog No     | Product name                |
|----|----------------|-----------------------------|
| 1  | H00008546-B01  | Anti-AP3B1 pAb              |
| 2  | H00000717-B02  | Anti-C2 pAb                 |
| 3  | H00001163-B01  | Anti-CKS1B pAb              |
| 4  | H00001164-B01  | Anti-CKS2 pAb               |
| 5  | H00001462-B01  | Anti-CSPG2 pAb              |
| 6  | H00054205-B01  | Anti-CYCS pAb               |
| 7  | H00003732-B01  | Anti-CD82 pAb               |
| 8  | H00005266-B01  | Anti-PI3 pAb                |
| 9  | H00006035-B01  | Anti-RNASE1 pAb             |
| 10 | H00008635-B01  | Anti-RNASET2 pAb            |
| 11 | H00007444-B01  | Anti-VRK2 pAb               |
| 12 | H00023054-M01  | Anti-NCOA6(1954-2063) mAb   |
| 13 | H00000648-M02  | Anti-BMI1(PCGF4) mAb        |
| 14 | H00001277-M01  | Anti-COL1A1(1021-1108)mAb   |
| 15 | H00009360-M02  | Anti-PPIG(13-107) mAb       |
| 16 | H00001610-M01  | Anti-DAO(119-218) mAb       |
| 17 | H00050807-M01  | Anti-DDEF1(1030-1129) mAb   |
| 18 | H00001728-M01  | Anti-NQO1 mAb               |
| 19 | H00002043-M02  | Anti-EPHA4(887-986) mAb     |
| 20 | H00002122-M01  | Anti-EVI1(952-1051) mAb     |
| 21 | H00002305-M02  | Anti-FOXM1(702-801) mAb     |
| 22 | H00002625-M01  | Anti-GATA3(103-200) mAb     |
| 23 | H00002896-M01  | Anti-GRN(494-593) mAb       |
| 24 | H00028951-M04  | Anti-TRIB2(254-343) mAb     |
| 25 | H00008349-M06  | Anti-HIST2H2BE(36-126) mAb  |
| 26 | H00003148-M03  | Anti-HMGB2 mAb              |
| 27 | H000008091-M01 | Anti-HMGA2(1-92) mAb        |
| 28 | H00003217-M03  | Anti-HOXB7(55-120) mAb      |
| 29 | H00008519-M01  | Anti-IFITM1 mAb             |
| 30 | H00003614-M01  | Anti-IMPDH1(201-300) mAb    |
| 31 | H00011004-M01  | Anti-KIF2C(1-100) mAb       |
| 32 | H00008543-M02  | Anti-LMO4 mAb               |
| 33 | H00051765-M03  | Anti-MST4 mAb(RP6-213H19.1) |
| 34 | H00004318-M03  | Anti-MMP9 mAb               |
| 35 | H00004605-M02  | Anti-MYBL2(601-700) mAb     |
| 36 | H00010525-M01  | Anti-HYOU1(901-999) mAb     |
| 37 | H00005163-M01  | Anti-PDK1(203-302) mAb      |
| 38 | H00005328-M01  | Anti-PLAU(78-177) mAb       |
| 39 | H00005495-M01  | Anti-PPM1B mAb              |
| 40 | H00005725-M01  | Anti-PTBP1(45-144) mAb      |

**S2 Table. Continued**

| <b>No</b> | <b>Catalog No</b> | <b>Product name</b>       |
|-----------|-------------------|---------------------------|
| 41        | H00005937-M02     | Anti-RBMS1 mAb            |
| 42        | H00005957-M01     | Anti-RCV1(101-200) mAb    |
| 43        | PAB3988           | Anti-AK3L1 pAb            |
| 44        | PAB1687           | Anti-BMI1 pAb             |
| 45        | PAB3539           | Anti-CDH3 pAb             |
| 46        | PAB4695           | Anti-COL1A1 pAb           |
| 47        | PAB1701           | Anti-UBE2S pAb            |
| 48        | PAB3007           | Anti-EPHA4 pAb            |
| 49        | PAB3427           | Anti-FYN pAb              |
| 50        | PAB3419           | Anti-BTK pAb              |
| 51        | PAB4472           | Anti-HDGF pAb             |
| 52        | PAB3605           | Anti-HPCAL1 pAb           |
| 53        | PAB4830           | Anti-CD82 pAb             |
| 54        | PAB2109           | Anti-MST4 pAb             |
| 55        | PAB4306           | Anti-MGAT2 pAb            |
| 56        | PAB4773           | Anti-MLLT4 pAb            |
| 57        | PAB4798           | Anti-MMP9 pAb             |
| 58        | PAB4158           | Anti-PPM1B pAb            |
| 59        | PAB2874           | Anti-CSNK1A1 pAb          |
| 60        | PAB2735           | Anti-PRPS1 pAb            |
| 61        | PAB2456           | Anti-HTRA1 pAb            |
| 62        | PAB1868           | Anti-PSCA pAb             |
| 63        | PAB3609           | Anti-RCVRN pAb            |
| 64        | MAB3537           | Anti-FN1 mAb, clone 568   |
| 65        | PAB8027           | Anti-CYCS pAb             |
| 66        | PAB12285          | Anti-IFITM1 pAb           |
| 67        | PAB12294          | Anti-ITGB2 pAb            |
| 68        | PAB10313          | Anti-AHSG pAb             |
| 69        | PAB11271          | Anti-BIRC5 pAb            |
| 70        | PAB10210          | Anti-FN1 pAb              |
| 71        | H00000133-B01P    | Anti-ADM Purified pAb     |
| 72        | H00000197-B01P    | Anti-AHSG Purified pAb    |
| 73        | H00009447-B01P    | Anti-AIM2 Purified pAb    |
| 74        | H00000205-B02P    | Anti-AK3L1 Purified pAb   |
| 75        | H00054443-B01P    | Anti-ANLN Purified pAb    |
| 76        | H00000397-B01P    | Anti-ARHGDIB Purified pAb |
| 77        | H00023650-B01P    | Anti-TRIM29 Purified pAb  |
| 78        | H00000537-D01P    | Anti-ATP6AP1 Purified pAb |
| 79        | H00010755-B01P    | Anti-GIPC1 Purified pAb   |
| 80        | H00000716-B01P    | Anti-C1S Purified pAb     |

**S2 Table. Continued**

| <b>No</b> | <b>Catalog No</b> | <b>Product name</b>           |
|-----------|-------------------|-------------------------------|
| 81        | H00000800-D01P    | Anti-CALD1 Purified pAb       |
| 82        | H00009308-B01P    | Anti-CD83 Purified pAb        |
| 83        | H00000991-D01P    | Anti-CDC20 Purified pAb       |
| 84        | H00001001-B01P    | Anti-CDH3 Purified pAb        |
| 85        | H00065010-B01P    | Anti-SLC26A6 Purified pAb     |
| 86        | H00001281-D01P    | Anti-COL3A1 Purified pAb      |
| 87        | H00001460-B01P    | Anti-CSNK2B Purified pAb      |
| 88        | H00027338-B01P    | Anti-UBE2S Purified pAb       |
| 89        | H00002335-B01P    | Anti-FN1 Purified pAb         |
| 90        | H00002534-D01P    | Anti-FYN Purified pAb         |
| 91        | H00002781-B01P    | Anti-GNAZ Purified pAb        |
| 92        | H00003068-B01P    | Anti-HDGF Purified pAb        |
| 93        | H00003162-B01P    | Anti-HMOX1 Purified pAb       |
| 94        | H00003191-B01P    | Anti-HNRPL Purified pAb       |
| 95        | H00003485-B01P    | Anti-IGFBP2 Purified pAb      |
| 96        | PAB13498          | Anti-COL3A1 pAb               |
| 97        | MAB3580           | Anti-COL3A1 mAb(clone8D1-8C7) |
| 98        | PAB6303           | Anti-UBE2I pAb                |
| 99        | PAB13272          | Anti-STMN1 pAb                |
| 100       | PAB14863          | Anti-ANXA6 pAb                |
| 101       | PAB14345          | Anti-COL1A2 pAb               |
| 102       | PAB9978           | Anti-Beta amyloid pAb         |
| 103       | H00003500-B01P    | Anti-IGHG1 pAb                |
| 104       | H00003535-B01P    | Anti-IGL pAb                  |
| 105       | H00007850-B01P    | Anti-IL1R2 pAb                |
| 106       | H00003925-D01P    | Anti-STMN1 pAb                |
| 107       | H00004257-D01P    | Anti-MGST1 pAb                |
| 108       | H00004686-B01P    | Anti-NCBP1 pAb                |
| 109       | H00011196-B01P    | Anti-SEC23IP pAb              |
| 110       | H00005033-B01P    | Anti-P4HA1                    |
| 111       | H00005119-B02P    | Anti-PCOLN3 pAb               |
| 112       | H00008000-B01P    | Anti-PSCA pAb                 |
| 113       | H00005691-B01P    | Anti-PSMB3 pAb                |
| 114       | H00005831-D01P    | Anti-PYCR1 pAb                |
| 115       | H00009052-B01P    | Anti-GPRC5A pAb               |
| 116       | H00008490-D01P    | Anti-RGS5 pAb                 |
| 117       | H00006574-M01     | Anti-SLC20A1 mAb              |
| 118       | H00001811-M01     | Anti-SLC26A3(501-600) mAb     |
| 119       | H00006627-B01P    | Anti-SNRPA1 pAb               |
| 120       | H00006715-D01P    | Anti-SRD5A1 pAb               |

**S2 Table. Continued**

| <b>No</b> | <b>Catalog No</b> | <b>Product name</b>            |
|-----------|-------------------|--------------------------------|
| 121       | H00006876-M01     | Anti-TAGLN mAb                 |
| 122       | H00007009-B01P    | Anti-TEGT mAb                  |
| 123       | H00007072-B01P    | Anti-TIA1 pAb                  |
| 124       | H00010103-M05     | Anti-TSPAN1(110-211) mAb       |
| 125       | H00011065-M01     | Anti-UBE2C(70-179) mAb         |
| 126       | H00007468-B01P    | Anti-WHSC pAb                  |
| 127       | H00000537-M01     | Anti-ATP6AP1(51-150) mpAb      |
| 128       | PAB14920          | Anti-PLAU pAb                  |
| 129       | PAB0283           | Anti-TRIM29 pAb                |
| 130       | MAB0059           | Anti-ARHGDIB mAb, clone97A1015 |
