# Supplementary material for: Identification of IGFBP2 and IGFBP3 As Compensatory Biomarkers for CA19-9 in Early-Stage Pancreatic Cancer Using a Combination of Antibody-Based and LC-MS/MS-Based Proteomics
Source: PubMed Central journal article supplement (PMC5007017; doi:10.1371/journal.pone.0161009), 2016-08-31
Supplement: pone.0161009.s008.pdf [file pone.0161009.s008.pdf]

**S3 Table. The average and median %CV of early-stage set and all-stage set.**

|             | %CV             |        |               |        |
|-------------|-----------------|--------|---------------|--------|
|             | Early-stage set |        | All-stage set |        |
|             | Average         | Median | Average       | Median |
| C2a         | 11.9%           | 11.2%  | 9.12%         | 8.28%  |
| C2b         | 12.7%           | 12.8%  | 13.3%         | 12.6%  |
| CRP         | 18.9%           | 13.3%  | 14.4%         | 12.1%  |
| IGFBP2      | 17.3%           | 15.3%  | 20.8%         | 18.8%  |
| IGFBP3      | 11.2%           | 10.5%  | 14.8%         | 14.0%  |
| Adiponectin | 14.2%           | 12.7%  | 13.0%         | 12.1%  |
