# Supplementary material for: Identification of IGFBP2 and IGFBP3 As Compensatory Biomarkers for CA19-9 in Early-Stage Pancreatic Cancer Using a Combination of Antibody-Based and LC-MS/MS-Based Proteomics
Source: PubMed Central journal article supplement (PMC5007017; doi:10.1371/journal.pone.0161009), 2016-08-31
Supplement: pone.0161009.s009.pdf [file pone.0161009.s009.pdf]

**S3 Table. Levels of markers in plasma of CA19-9-negative IDACP patients (all stages)**

| Stage | CA19-9<br>(U/mL) | CEA<br>(ng/mL) | DUPAN-2<br>(U/mL) | IGFBP2<br>(fmol/uL) | IGFBP3<br>(fmol/uL) |
|-------|------------------|----------------|-------------------|---------------------|---------------------|
| I     | 8.8              | 1.1            | 24                | 26.02               | 107.79              |
| II    | 11.8             | 2.4            | 24                | 13.90               | 152.52              |
| II    | 11               | 1.4            | 24                | 27.78               | 92.56               |
| II    | 20               | 1.7            | 24                | 7.48                | 161.74              |
| II    | 25.9             | 1              | 40                | 15.07               | 130.11              |
| II    | 23.3             | 2.9            | 24                | 34.55               | 100.35              |
| II    | 35.6             | 2.4            | 24                | 31.90               | 58.35               |
| III   | 8.3              | 34.8           | 1100              | 29.14               | 130.11              |
| III   | 1.1              | 2              | 1601              | 10.27               | 112.47              |
| III   | 13.2             | 1.1            | 24                | 16.17               | 128.87              |
| III   | 0.9              | 8.2            | 1601              | 13.77               | 62.88               |
| IV    | 0.9              | 3              | 620               | 30.88               | 73.69               |
| IV    | 18.4             | 2.7            | 88                | 33.75               | 118.41              |
| IV    | 32.4             | 3.6            | 28                | 23.53               | 110.29              |
| IV    | 19.8             | 4              | 24                | 87.89               | 97.90               |
| IV    | 24.7             | 8.2            | 1601              | 29.83               | 92.16               |
| IV    | 12.1             | 12             | 1601              | 34.44               | 106.37              |
| IV    | 0.9              | 1.3            | 1100              | 13.90               | 120.10              |
| IV    | 29.7             | 23.7           | 1601              | 33.04               | 121.33              |
| IV    | 0.9              | 168            | 1601              | 10.21               | 78.43               |
| IV    | 18.9             | 3.6            | 1601              | 24.61               | 67.30               |
| IV    | 31.5             | 1.8            | 1601              | 14.10               | 72.77               |
| IV    | 2.7              | 7.2            | 1601              | 37.32               | 163.69              |
